# Supplementary material
Source: HighWire-hosted journal article supplement (http://molpharm.aspetjournals.org/highwire/filestream/76532/field_highwire_adjunct_files/0/MOL_Mashiko_erratum.pdf)
Supplement: MOL_Mashiko_erratum.pdf [file MOL_Mashiko_erratum.pdf]

# Correction to “A Pair-Feeding Study Reveals That a Y5 Antagonist Causes Weight Loss in Diet-Induced Obese Mice by Modulating Food Intake and Energy Expenditure”

Table 2 is missing from the article above [Mashiko S, Ishihara A, Iwaasa H, Sano H, Ito J, Gomori A, Oda Z, Moriya R, Matsushita H, Jitsuoka M, et al. (2007) *Mol Pharmacol* 71:602–608]. It appears in its entirety below. In addition, under the heading “Effects of the Y5 Antagonist and Pair Feeding on mRNA Expression Levels in White and Brown Adipose Tissue, Liver, and Skeletal Muscle” on page 605, text citations for Table 2 should appear after the last sentence in each paragraph.

The online version of this article will be corrected in departure from the print version.

The printer regrets this error and apologizes for any confusion or inconvenience it may have caused.

TABLE 2

mRNA expression levels of Y5 antagonist-treated or pair-fed mice in liver, BAT, WAT, and skeletal muscle

Data are means  $\pm$  S.E.M. of 9 to 11 mice.

|                 | Vehicle          | Y5 Antagonist                  | Pair-Fed        |
|-----------------|------------------|--------------------------------|-----------------|
| BAT             |                  |                                |                 |
| UCP-1           | 1.97 $\pm$ 0.22  | 2.75 $\pm$ 0.25 <sup>***</sup> | 1.72 $\pm$ 0.12 |
| UCP-2           | 2.99 $\pm$ 0.22  | 3.18 $\pm$ 0.37                | 2.40 $\pm$ 0.23 |
| UCP-3           | 0.53 $\pm$ 0.04  | 0.91 $\pm$ 0.05 <sup>***</sup> | 0.60 $\pm$ 0.05 |
| $\beta_3$ AR    | 1.83 $\pm$ 0.16  | 1.85 $\pm$ 0.11                | 1.58 $\pm$ 0.14 |
| WAT             |                  |                                |                 |
| UCP-1           | 12.91 $\pm$ 3.25 | 34.68 $\pm$ 14.43              | 9.32 $\pm$ 4.12 |
| UCP-2           | 0.56 $\pm$ 0.05  | 1.08 $\pm$ 0.34                | 0.57 $\pm$ 0.07 |
| UCP-3           | 0.21 $\pm$ 0.02  | 0.43 $\pm$ 0.08*               | 0.29 $\pm$ 0.05 |
| $\beta_3$ AR    | 1.65 $\pm$ 0.21  | 3.23 $\pm$ 0.38 <sup>#</sup>   | 2.03 $\pm$ 0.33 |
| SREBP-1c        | 0.72 $\pm$ 0.08  | 1.54 $\pm$ 0.28*               | 0.93 $\pm$ 0.17 |
| Liver           |                  |                                |                 |
| SREBP-1c        | 5.34 $\pm$ 0.50  | 3.30 $\pm$ 0.25 <sup>**</sup>  | 4.46 $\pm$ 0.41 |
| Dio1            | 1.07 $\pm$ 0.07  | 1.54 $\pm$ 0.11 <sup>***</sup> | 0.99 $\pm$ 0.11 |
| Skeletal muscle |                  |                                |                 |
| UCP-2           | 0.60 $\pm$ 0.06  | 0.75 $\pm$ 0.08                | 0.51 $\pm$ 0.07 |
| UCP-3           | 0.20 $\pm$ 0.02  | 0.16 $\pm$ 0.03                | 0.20 $\pm$ 0.02 |
| Cpt1b           | 1.93 $\pm$ 0.12  | 1.60 $\pm$ 0.11                | 1.76 $\pm$ 0.12 |

\*  $p < 0.05$ , \*\*  $p < 0.01$  vs. ad libitum-fed vehicle-treated group.

#  $p < 0.05$ , ##  $p < 0.01$  vs. pair-fed vehicle-treated group.
